# Supplementary material for: High-Throughput Sequencing Reveals a Potentially Novel Sulfurovum Species Dominating the Microbial Communities of the Seawater–Sediment Interface of a Deep-Sea Cold Seep in South China Sea
Source: MDPI journal article supplement (doi:10.3390/microorganisms8050687), 2020-05-08
Supplement: s1 [file s1]

## Supplementary data

**Table S1.** Sample information.

**Table S2.** Summary of amplicon sequencing information based on the next-generation sequencing platform.

**Table S3.** Summary of sequencing information based on the Pacbio sequencing platform.

**Table S4.** Clones from NCBI that are close to OTU-L1. Clones with 98.55% and higher similarities to OTU-L1 are shown.

| <b>Accession No.</b> | <b>Identity</b> | <b>isolation source</b>                                            |
|----------------------|-----------------|--------------------------------------------------------------------|
| GQ261780             | 99.10%          | Deep sea sediment associated with whale falls                      |
| KX097744             | 98.97%          | Hydrothermal deposits and seafloor sediments across Okinawa trough |
| GQ357003             | 98.97%          | Methane seep sediment                                              |
| AM745152             | 98.97%          | Marine sediments                                                   |
| KX097275             | 98.90%          | Hydrothermal deposits and seafloor sediments across Okinawa trough |
| KX097389             | 98.83%          | Hydrothermal deposits and seafloor sediments across Okinawa trough |
| GQ356979             | 98.83%          | Methane seep sediment                                              |
| AY197375             | 98.76%          | Guaymas basin hydrothermal vent sediments                          |
| KX097506             | 98.76%          | Hydrothermal deposits and seafloor sediments across Okinawa trough |
| KF545022             | 98.76%          | Deep-sea sediment                                                  |
| AF420344             | 98.76%          | Guaymas basin hydrothermal vent sediments                          |
| KX097364             | 98.69%          | Hydrothermal deposits and seafloor sediments across Okinawa trough |
| KX097354             | 98.69%          | Hydrothermal deposits and seafloor sediments across Okinawa trough |
| AY549001             | 98.69%          | Marine environment                                                 |
| KP091181             | 98.62%          | Guaymas basin hydrothermal sediments                               |
| AB015531             | 98.62%          | Deep-sea sediments                                                 |
| KM356278             | 98.55%          | Hydrate ridge                                                      |
| KX097729             | 98.55%          | Hydrothermal deposits and seafloor sediments across Okinawa trough |
| JQ036283             | 98.55%          | Hydrate ridge sediment                                             |
| JN873954             | 98.55%          | Hydrothermal plumes                                                |

**Table S5.** The genome information of *Sulfurovum* sp..

| Genome data                                   | <i>Sulfurovum</i> sp. |
|-----------------------------------------------|-----------------------|
| Estimated size (bp)                           | 2124559               |
| Size (bp)                                     | 1998954               |
| Contigs                                       | 4027                  |
| Gene                                          | 1070                  |
| GC%                                           | 37.59%                |
| Genes with function prediction in Nr database | 3096                  |

**Table S6.** Genes associated with carbon fixation, sulfur oxidation, and nitrate reduction in the *Sulfurovum* genome assembly.

| Gene code         | Length | E value  | Function annotation                 |
|-------------------|--------|----------|-------------------------------------|
| Carbon fixation   |        |          |                                     |
| 0131              | 207    | 1e-38    | ATP citrate synthase                |
| 0810              | 198    | 4e-36    | ATP citrate synthase                |
| Sulfur oxidation  |        |          |                                     |
| 0921              | 300    | 3e-49    | Sulfur oxidation protein SoxYZ      |
| 0922              | 558    | 5e-67    | Sulfur oxidation protein SoxYZ      |
| 0923              | 360    | 1e-36    | Sulfur oxidation protein SoxCD      |
| Nitrate reduction |        |          |                                     |
| 0165              | 123    | 2.00E-10 | Nitrate reductase catalytic subunit |

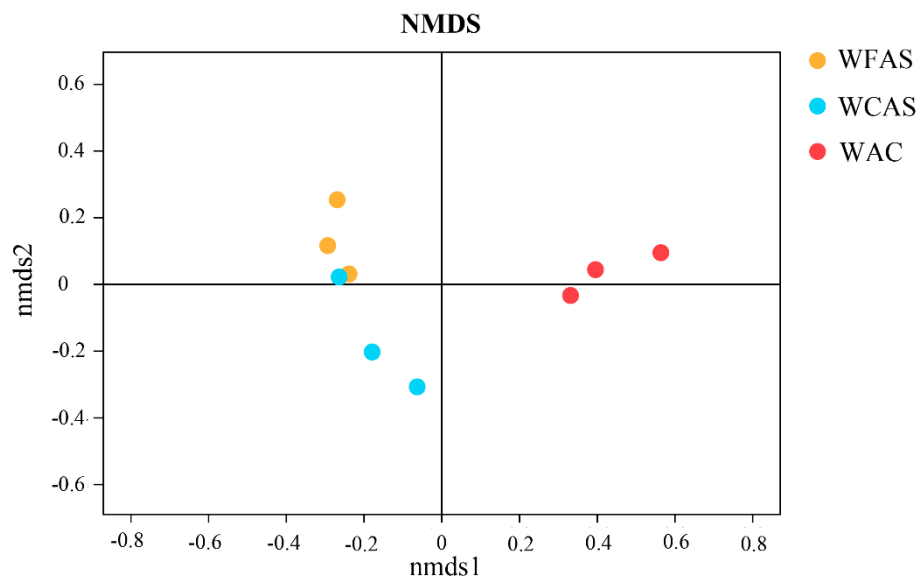

**Figure S1.** NMDS plot showing the differences of microbial communities in the nine seawater samples.

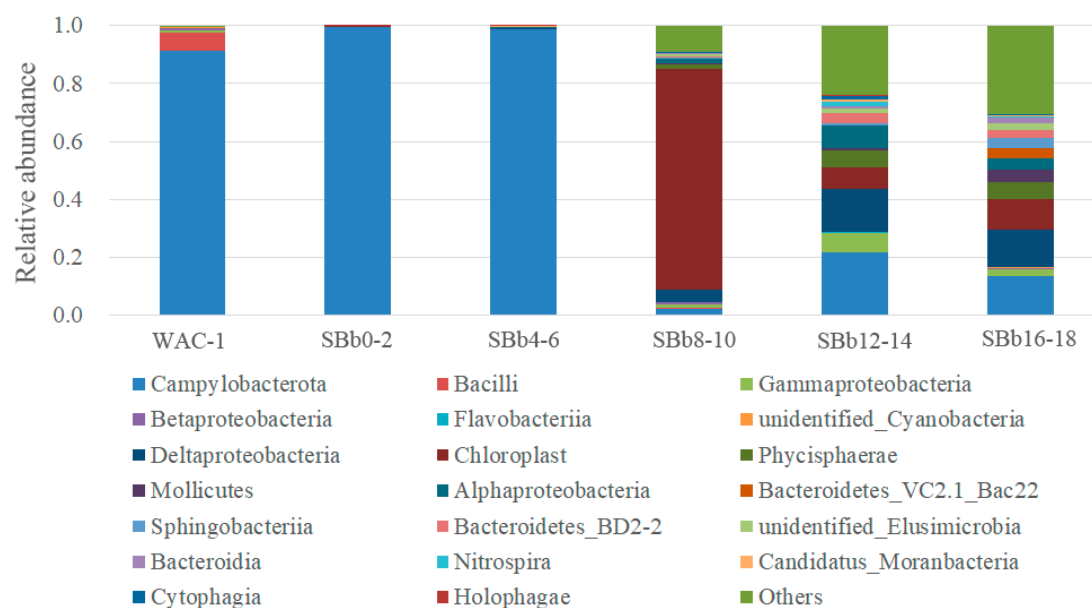

**Figure S2.** Diversity and distribution of microbial sequence subreads in seawater and sediment libraries. WAC-1 represents the library of the seawater of animal community (WAC); SBb represent the libraries of the sediments away from the center, with the number after SBb indicating the depth (cm). The subreads were generated with the Pacbio sequencing platform and classified at the phylum/class level. Each color represents the percentage of the taxon in the total assemblage. Top 10 groups in each sample are labeled, and other groups are integrated as "Others".

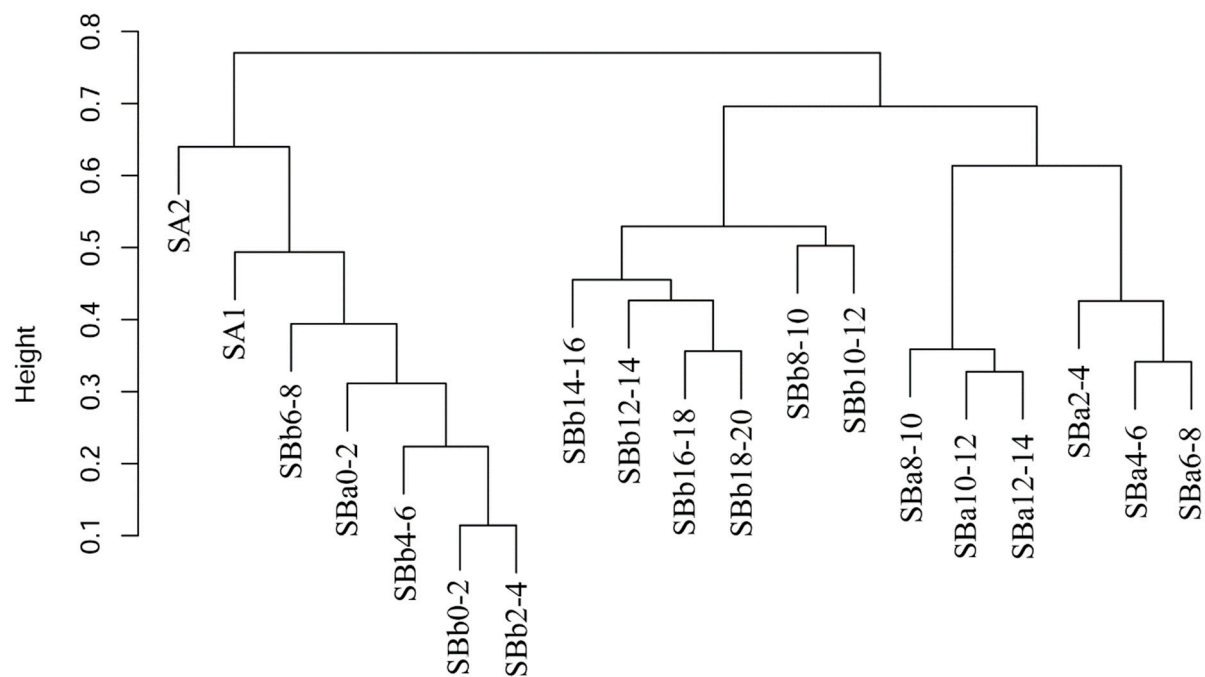

**Figure S3.** Cluster analysis of sediment samples. The cluster dendrogram was constructed at the class level.

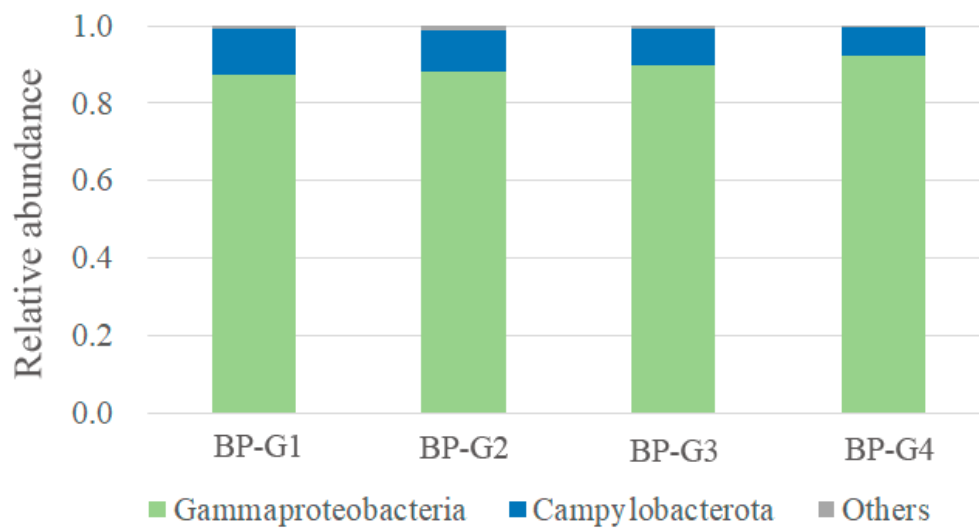

**Figure S4.** Diversity and distribution of microbial sequence subreads in animal-associated libraries. BP-G1, BP-G2, BP-G3, BP-G4 represent the libraries of the gills of *Bathymodiolus platifrons*. The subreads were generated with the Pacbio sequencing platform and classified at the phylum/class level. Each color represents the percentage of the taxon in the total assemblage. Top 10 groups in each sample are labeled, and other groups were integrated as “Others”.
