# Supplementary material for: High-Throughput Sequencing Reveals a Potentially Novel Sulfurovum Species Dominating the Microbial Communities of the Seawater–Sediment Interface of a Deep-Sea Cold Seep in South China Sea
Source: Microorganisms. 2020 May 8;8(5):687. doi: 10.3390/microorganisms8050687 (PMC7284658; doi:10.3390/microorganisms8050687)
Supplement: Supplementary file 1 [file microorganisms-08-00687-s001.zip]

Archive with 8 entries (8 files):
- Figure S1.tif
- Figure S2.tif
- Figure S3.tif
- Figure S4.tif
- Supplementary data.pdf
- Table S1.xlsx
- Table S2.xlsx
- Table S3.xlsx
