# Supplementary material for: High-Throughput Sequencing Reveals a Potentially Novel Sulfurovum Species Dominating the Microbial Communities of the Seawater–Sediment Interface of a Deep-Sea Cold Seep in South China Sea
Source: Microorganisms. 2020 May 8;8(5):687. doi: 10.3390/microorganisms8050687 (PMC7284658; doi:10.3390/microorganisms8050687)
Supplement: Supplementary file 1 [file microorganisms-08-00687-s001.zip › Table S1.xlsx]

## Sheet: Sheet1
Table S1. Sample information.
Samples	Sampling method	Location	Depth (m)	Sequencing methods
Water samples		119.285°E, 22.116°N
WAC-1	Syringe-like equipment		1120	NGS amplicon sequencing
WAC-2	Syringe-like equipment		1120	NGS amplicon sequencing
WAC-3	Syringe-like equipment		1120	NGS amplicon sequencing and Pacbio amplicon sequencing
WCAS-1	Water Sampler on ROV		1118	NGS amplicon sequencing
WCAS-2	Water Sampler on ROV		1118	NGS amplicon sequencing
WCAS-3	Water Sampler on ROV		1118	NGS amplicon sequencing
WFAS-1	Independent Water Sampler		1060	NGS amplicon sequencing
WFAS-2	Independent Water Sampler		1000	NGS amplicon sequencing
WFAS-3	Independent Water Sampler		900	NGS amplicon sequencing
Sediment samples
SA1	Television grab	119.285°E, 22.116°N	1120	NGS amplicon sequencing
SA2	Television grab	119.285°E, 22.116°N	1120	NGS amplicon amplicon sequencing and metagenome sequencing
Sba	Pushcore	119.285°E, 22.116°N	1131
SBa0-2				NGS amplicon sequencing and pacbio amplicon sequencing
SBa2-4				NGS amplicon sequencing
SBa4-6				NGS amplicon sequencing and pacbio amplicon sequencing
SBa6-8				NGS amplicon sequencing
SBa8-10				NGS amplicon sequencing and pacbio amplicon sequencing
SBa10-12				NGS amplicon sequencing
SBa12-14				NGS amplicon sequencing and pacbio amplicon sequencing
SBb	Pushcore	119.288° E, 22.125° N	1154
SBb0-2				NGS amplicon sequencing and pacbio amplicon sequencing
SBb2-4				NGS amplicon sequencing
SBb4-6				NGS amplicon sequencing and pacbio amplicon sequencing
SBb6-8				NGS amplicon sequencing
SBb8-10				NGS amplicon sequencing and Pacbio amplicon sequencing
SBb10-12				NGS amplicon sequencing
SBb12-14				NGS amplicon sequencing and Pacbio amplicon sequencing
SBb14-16				NGS amplicon sequencing
SBb16-18				NGS amplicon sequencing and Pacbio amplicon sequencing
SBb18-20				NGS amplicon sequencing
Animal samples
Shinkaia crosnieri		119.285°E, 22.116°N	1120
SC-G1 (gill)	Television grab			NGS amplicon sequencing
SC-G2 (gill)	Television grab			NGS amplicon sequencing
SC-G3 (gill)	Television grab			NGS amplicon sequencing
SC-G4 (gill)	Television grab			NGS amplicon sequencing
Bathymodiolus platifrons		119.285°E, 22.116°N	1120
BP-G1 (gill)	Television grab			NGS amplicon sequencing and pacbio amplicon sequencing
BP-G2 (gill)	Television grab			NGS amplicon sequencing and pacbio amplicon sequencing
BP-G3 (gill)	Television grab			NGS amplicon sequencing and pacbio amplicon sequencing
BP-G4 (gill)	Television grab			NGS amplicon sequencing and pacbio amplicon sequencing
				NGS amplicon sequencing and pacbio amplicon sequencing
