# Supplementary material for: High-Throughput Sequencing Reveals a Potentially Novel Sulfurovum Species Dominating the Microbial Communities of the Seawater–Sediment Interface of a Deep-Sea Cold Seep in South China Sea
Source: Microorganisms. 2020 May 8;8(5):687. doi: 10.3390/microorganisms8050687 (PMC7284658; doi:10.3390/microorganisms8050687)
Supplement: Supplementary file 1 [file microorganisms-08-00687-s001.zip › Table S2.xlsx]

## Sheet: Sheet1
Table S2. Summary of amplicon sequencing information based on the next-generation sequencing platform.
Samples	Effective tags	Unique tags	Taxon tags	Observed species	Shannon	Simpson	Good's coverage
WAC-1	66294	5121	61170	1893	5.915	0.881	0.972
WAC-2	53431	6827	46604	2042	5.992	0.854	0.974
WAC-3	60389	4267	56122	1567	3.394	0.568	0.975
WCAS-1	61415	7430	53931	2434	7.247	0.953	0.968
WCAS-2	71179	3655	67519	1638	6.844	0.97	0.98
WCAS-3	58540	17125	41415	495	5.111	0.89	0.996
WFAS-1	66165	13278	52887	706	5.078	0.901	0.994
WFAS-2	70954	15816	55138	814	6.292	0.963	0.993
WFAS-3	72362	17545	54817	791	6.52	0.975	0.993
SA1	78713	28224	50489	1038	5.395	0.851	0.991
SA2	85745	21179	64542	1072	7.003	0.936	0.996
SBa0-2	69825	11996	57828	656	2.968	0.6	0.992
SBa2-4	57438	19132	38274	1387	8.061	0.987	0.993
SBa4-6	52055	18544	33485	1645	8.367	0.991	0.987
SBa6-8	74541	25524	49013	1706	8.232	0.988	0.991
SBa8-10	85448	29092	56342	1726	8.225	0.987	0.988
SBa10-12	80092	32456	47631	1558	7.8	0.977	0.991
SBa12-14	80247	27053	53189	1851	8.601	0.991	0.989
SBb0-2	67542	2958	64583	1772	3.532	0.506	0.975
SBb2-4	73633	3087	70545	2090	4.217	0.584	0.972
SBb4-6	57633	4107	53525	2460	5.239	0.697	0.965
SBb6-8	67943	6378	61564	2740	6.745	0.846	0.962
SBb8-10	58545	16419	42123	2951	8.578	0.981	0.971
SBb10-12	48965	17301	31661	3206	9.219	0.991	0.972
SBb12-14	65977	16264	49711	3241	8.641	0.978	0.961
SBb14-16	56016	18487	37528	3123	8.042	0.93	0.97
SBb16-18	58329	19973	38354	3084	8.989	0.988	0.973
SBb18-20	61840	22561	39277	3014	9.01	0.987	0.972
SC-G1	62315	10256	52044	378	2.514	0.527	0.999
SC-G2	61287	9983	51297	493	4.518	0.869	0.999
SC-G3	78826	10991	67833	296	3.264	0.734	0.998
SC-G4	63821	7436	56370	332	2.073	0.472	0.999
BP-G1	76097	8995	67102	163	2.518	0.779	0.998
BP-G2	79190	7447	71743	203	2.378	0.68	0.998
BP-G3	71117	9990	61127	204	2.603	0.783	0.998
BP-G4	82463	9210	73253	231	2.698	0.787	0.998
