# Supplementary material for: High-Throughput Sequencing Reveals a Potentially Novel Sulfurovum Species Dominating the Microbial Communities of the Seawater–Sediment Interface of a Deep-Sea Cold Seep in South China Sea
Source: Microorganisms. 2020 May 8;8(5):687. doi: 10.3390/microorganisms8050687 (PMC7284658; doi:10.3390/microorganisms8050687)
Supplement: Supplementary file 1 [file microorganisms-08-00687-s001.zip › Table S3.xlsx]

## Sheet: Sheet1
Table S3. Summary of sequencing information based on the Pacbio sequencing platform.
Sample	Subreads	Observed species	Shannon	Simpson	Good's coverage
WAC-1	4358	29	1.396	0.367	0.998
SBb0-2	10036	15	0.204	0.038	0.994
SBb4-6	6098	24	0.393	0.078	0.989
SBb8-10	7202	189	2.506	0.421	0.908
SBb12-14	4310	439	7.292	0.967	0.838
SBb16-18	8639	494	7.392	0.973	0.77
BP-G1	15043	52	1.045	0.2975	0.999
BP-G2	10168	43	0.8944	0.2652	0.9982
BP-G3	16587	44	0.7947	0.2273	0.9991
BP-G4	14197	38	0.645	0.1861	0.9986
